# Supplementary material for: SmMYC2a and SmMYC2b played similar but irreplaceable roles in regulating the biosynthesis of tanshinones and phenolic acids in Salvia miltiorrhiza
Source: PubMed Central journal article supplement (PMC4780012; doi:10.1038/srep22852), 2016-03-07
Supplement: srep22852-s1.pdf [file srep22852-s1.pdf]

***SmMYC2a* and *SmMYC2b* played similar but irreplaceable roles in regulating the biosynthesis of tanshinones and phenolic acids in *Salvia miltiorrhiza***

Yangyun Zhou<sup>1</sup>, Wei Sun<sup>2</sup>, Junfeng Chen<sup>1</sup>, Hexin Tan<sup>3</sup>, Ying Xiao<sup>1</sup>, Qing Li<sup>1</sup>, Qian Ji<sup>3</sup>, Shouhong Gao<sup>1</sup>, Li Chen<sup>1</sup>, Shilin Chen<sup>2</sup>, Lei Zhang<sup>3\*</sup> and Wansheng Chen<sup>1\*</sup>

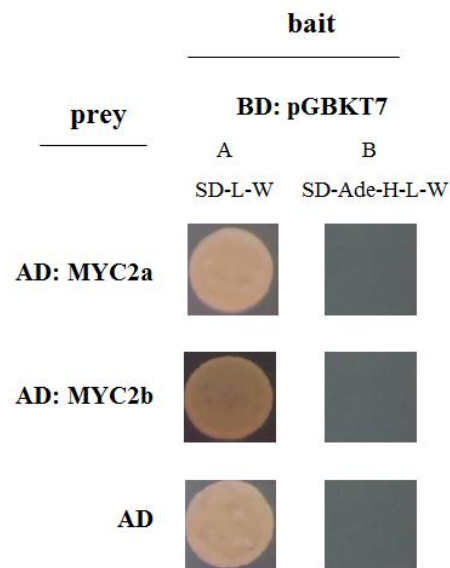

**Supplementary Figure S1.** *SmMYC2a* and *SmMYC2b* were not capable of auto-activating reporting genes in Y2H assay.

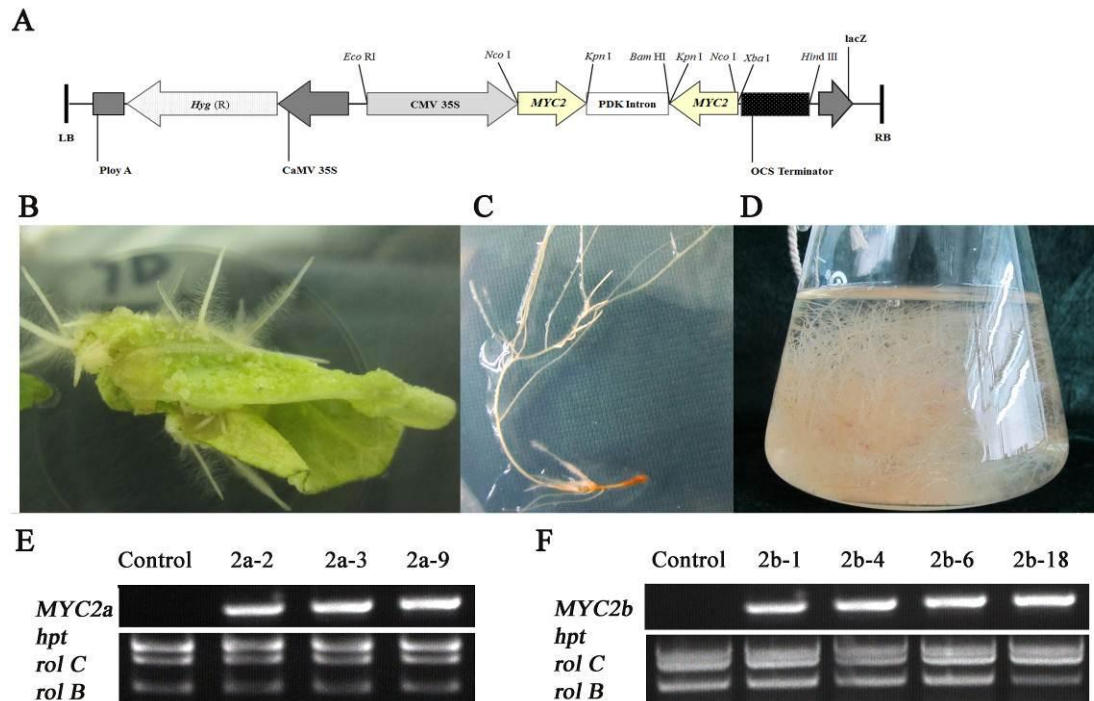

**Supplementary Figure S2.** Construction of *MYC2a/b-RNAi* transgenic hairy root lines.

(A) Schematic representation of *pCambia1300-pHANNBIAL* vector.

(B) Fresh hairy roots from leaf explant which carried *pCambia1300-pHANNBIAL* vector.

(C) Hairy roots of (B) after hygromycin selection.

(D) Hairy roots of (B) in liquid medium.

(E, F) Identification of *MYC2a/b* transgenic hairy roots by PCR amplification of *MYC2*, *hpt*, *rol B*, and *rol C* genes.

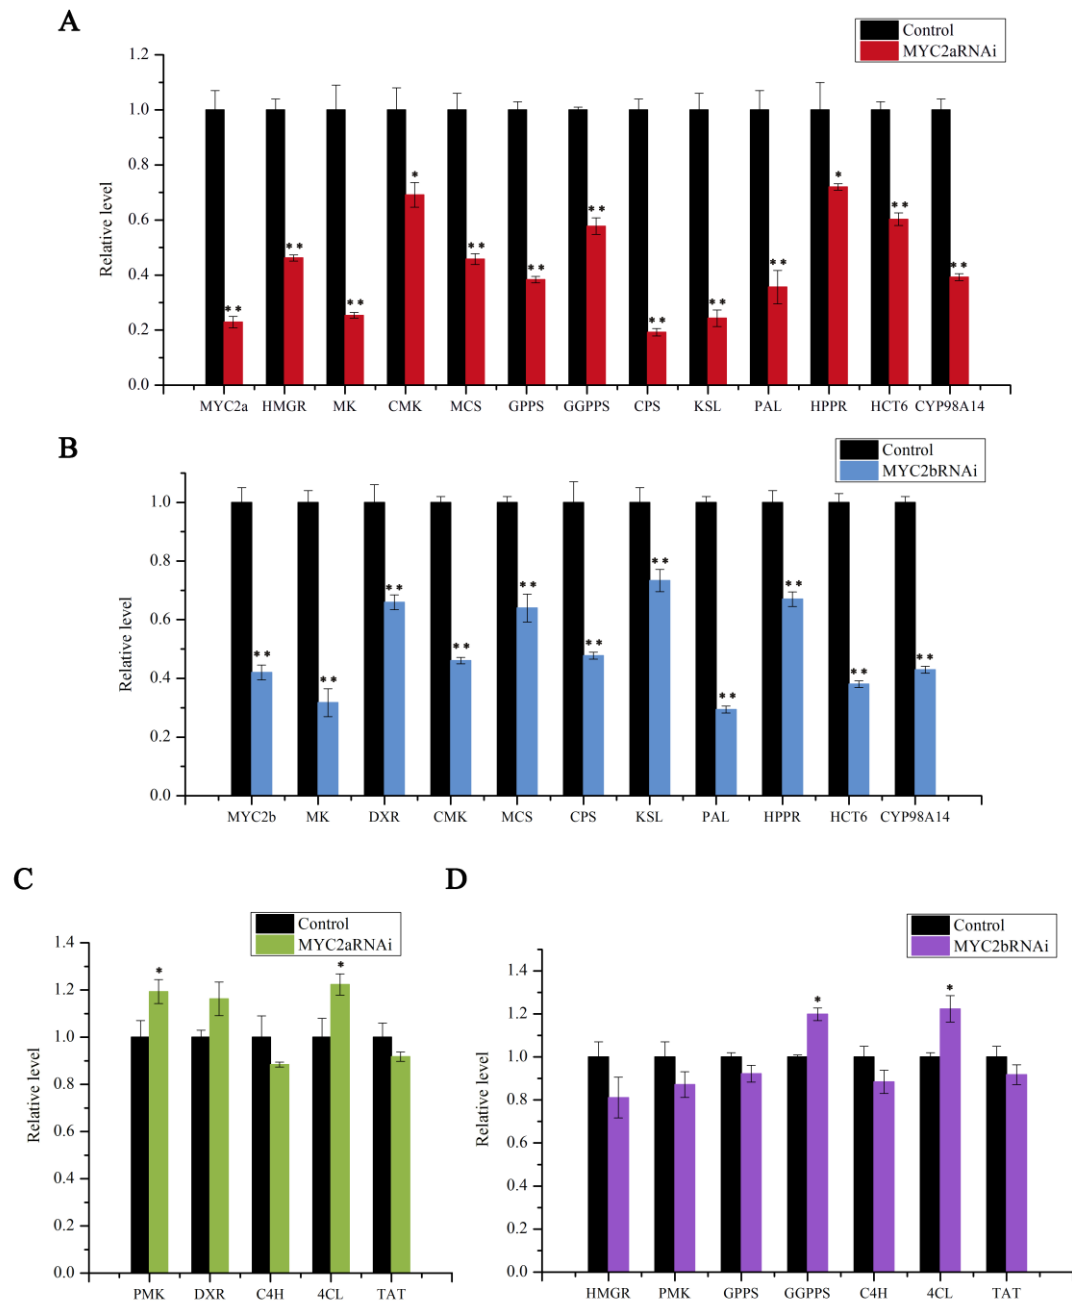

**Supplementary Figure S3.** Expression of *SmMYC2a/b* and pathway genes in control hairy roots and transgenic *SmMYC2a/b* suppressed hairy roots. Each data point was the average of three or four biological replicates. *Actin* was used as a control for normalization. Error bars indicated SD. "\*" indicated  $p < 0.05$  and "\*\*" indicated  $p < 0.01$ .

(A) Expression of significantly repressed genes in *MYC2a-RNAi* transgenic hairy roots.

(B) Expression of significantly repressed genes in *MYC2b-RNAi* transgenic hairy

roots.

(C, D) Other genes tested in *MYC2a/b-RNAi* transgenic hairy roots.

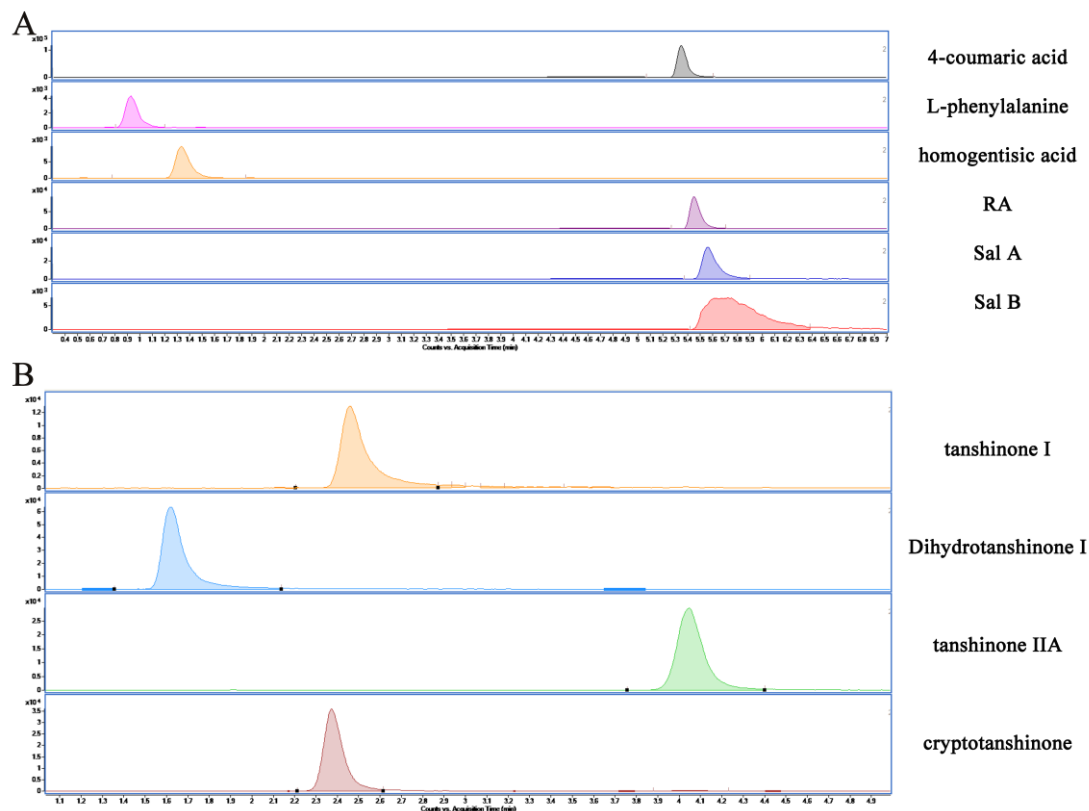

**Supplementary Figure S4.** Chromatogram map of 10 standard substances determined.

(A) 6 hydrophilic phenolic acid compounds using ESI in negative-ion mode.

(B) 4 lipophilic tanshinones using positive-ion mode.

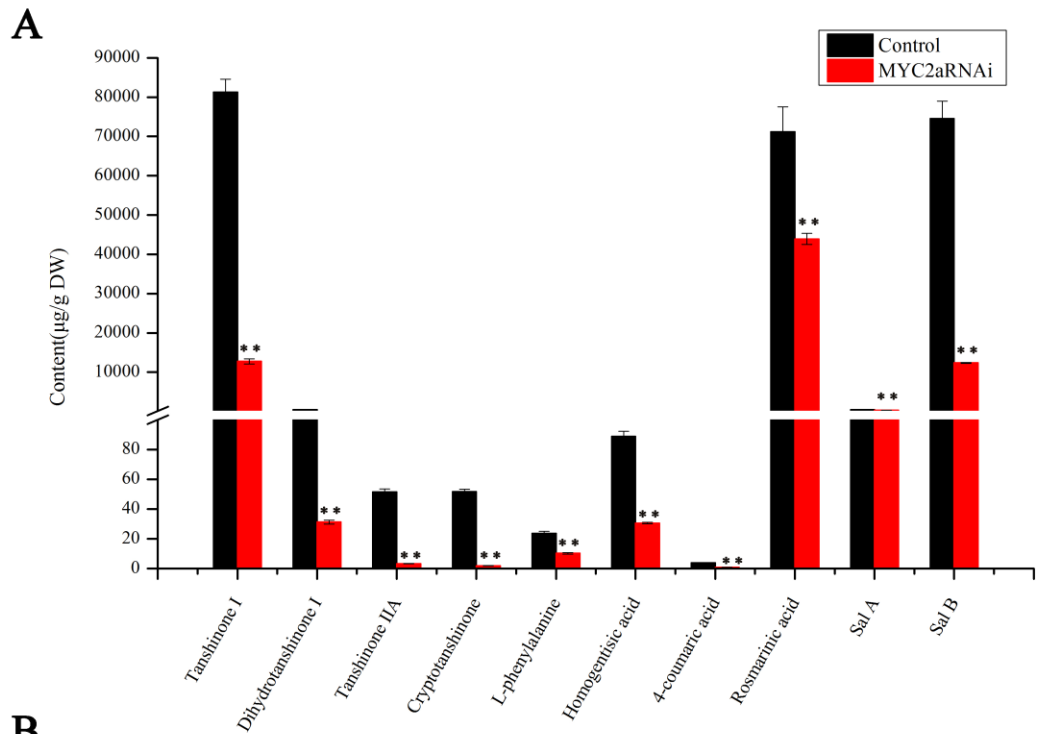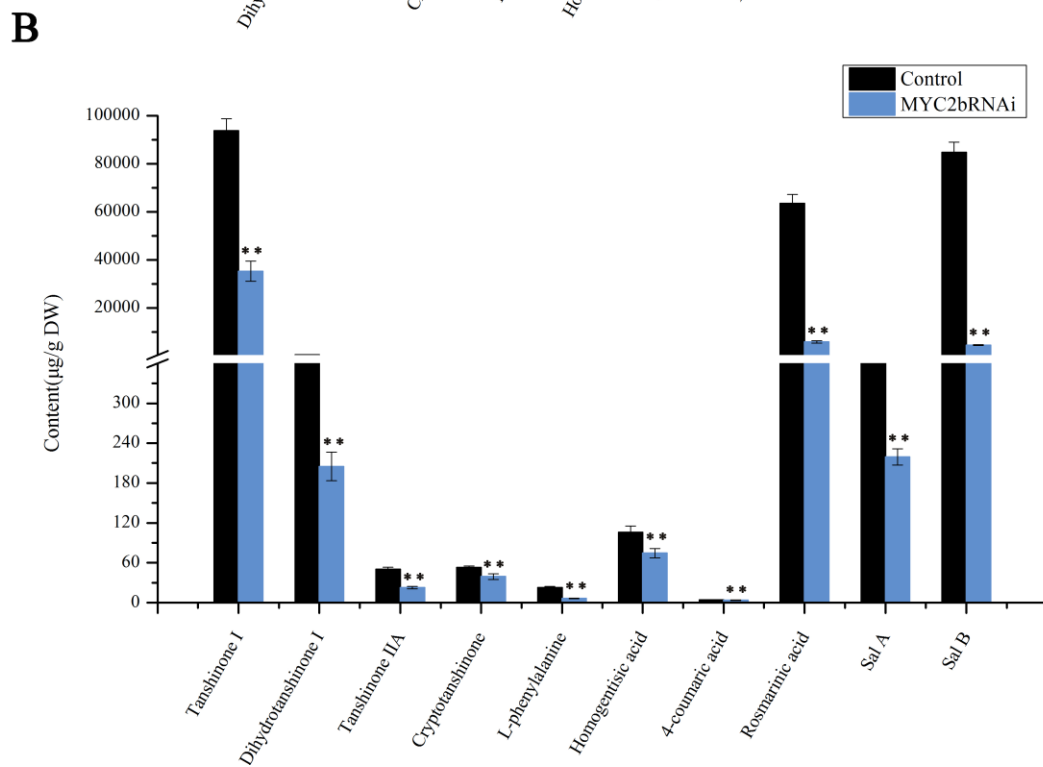

**Supplementary Figure S5.** Determination of content of target compounds in transgenic *MYC2a/b-RNAi* hairy roots. "\*" indicated  $p < 0.05$  and "\*\*\*" indicated  $p < 0.01$ .

(A) The yield of compounds was affected by RNAi of *SmMYC2a*. Each data point was the average of three biological replicates. Error bars indicated SD.

(B) Content of compounds changed in transgenic *SmMYC2b* hairy roots compared with control group. Each data point was the average of three or four biological replicates. Error bars indicated SD.

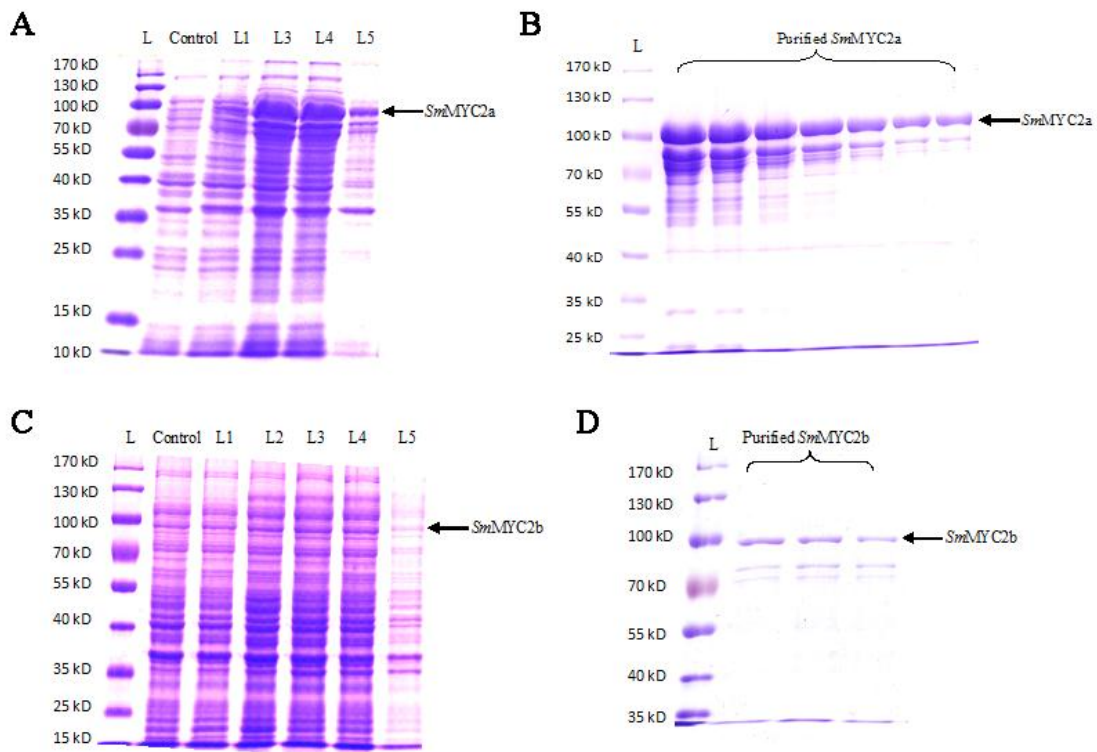

**Supplementary Figure S6.** Expression and purification of *SmMYC2a* and *SmMYC2b* proteins.

L: Prestained Protein Ladder (10-170 kD);

Control, uninduced *E.coli* strain BL21(DE3) which carried *pET-32a*;

Lane 1, induced *E.coli* strain BL21(DE3) which carried *pET-32a* by 1mM IPTG;

Lane 2, uninduced *E.coli* strain BL21(DE3) which carried *pET-32a-MYC2*;

Lane 3, induced *E.coli* strain BL21(DE3) which carried *pET-32a-MYC2* by 1mM IPTG;

Lane 4, supernatant of Lane 3;

Lane 5, precipitation of Lane 3.

(A, B) Recombinant *SmMYC2a* protein expressed in *E.coli* BL21 (DE3) and purified *SmMYC2a* protein applying immobilized metal affinity chromatography technique.

(C, D) SDS-PAGE analysis of recombinant and purified *SmMYC2b* proteins.

**Supplementary Table S1.** Information of released bHLH genes used in the construction of phylogenetic tree.

| Name              | Gene ID        | Plant                                          | Family       |
|-------------------|----------------|------------------------------------------------|--------------|
| <i>AlbHLLH</i>    | XM_002892031.1 | <i>Arabidopsis lyrata</i> subsp. <i>lyrata</i> | Brassicaceae |
| <i>AlbHLLH2</i>   | XM_002882027.1 | <i>Arabidopsis lyrata</i> subsp. <i>lyrata</i> | Brassicaceae |
| <i>AlMYC2</i>     | XM_002893686.1 | <i>Arabidopsis lyrata</i> subsp. <i>lyrata</i> | Brassicaceae |
| <i>AtabHLLH13</i> | KD597917.1     | <i>Aegilops tauschii</i>                       | Poaceae      |
| <i>AtbHLLH13</i>  | NM_100009.2    | <i>Arabidopsis thaliana</i>                    | Brassicaceae |
| <i>AtbHLLHai</i>  | NM_130216.2    | <i>Arabidopsis thaliana</i>                    | Brassicaceae |
| <i>AtMYC2</i>     | NM_102998.3    | <i>Arabidopsis thaliana</i>                    | Brassicaceae |
| <i>AtMYC4</i>     | NM_117897.3    | <i>Arabidopsis thaliana</i>                    | Brassicaceae |
| <i>BoMYC</i>      | EF423803.1     | <i>Brassica oleracea</i> var. <i>gemmifera</i> | Brassicaceae |
| <i>CsMYC2</i>     | AF283507.2     | <i>Catharanthus roseus</i>                     | Vinceae      |
| <i>CsMYC2a</i>    | CM002924.1     | <i>Cucumis sativus</i>                         | Vinceae      |
| <i>GhbHLLH</i>    | FJ358540.1     | <i>Gossypium hirsutum</i>                      | Malvaceae    |
| <i>GobHLLH13</i>  | KN667611.1     | <i>Glycine soja</i>                            | Fabaceae     |
| <i>GsbHLLH13</i>  | KN660483.1     | <i>Glycine soja</i>                            | Fabaceae     |
| <i>LeMYC1</i>     | KC818627.1     | <i>Lithospermum erythrorhizon</i>              | Boraginaceae |
| <i>MtbHLLH1</i>   | XM_003612861.1 | <i>Medicago truncatula</i>                     | Fabaceae     |
| <i>MtbHLLH2</i>   | CM001224.2     | <i>Medicago truncatula</i>                     | Fabaceae     |
| <i>MtbHLLH3</i>   | CM001223.2     | <i>Medicago truncatula</i>                     | Fabaceae     |
| <i>MtbHLLHai</i>  | CM001224.2     | <i>Medicago truncatula</i>                     | Fabaceae     |

|                |                |                                    |              |
|----------------|----------------|------------------------------------|--------------|
| <i>MtMYC2</i>  | XM_003628772.1 | <i>Medicago truncatula</i>         | Fabaceae     |
| <i>NaMYC2</i>  | KC832837.1     | <i>Nicotiana attenuata</i>         | Solanaceae   |
| <i>NaMYC1</i>  | KC906192.1     | <i>Nicotiana attenuata</i>         | Solanaceae   |
| <i>NbbHLH1</i> | GQ859152.1     | <i>Nicotiana benthamiana</i>       | Solanaceae   |
| <i>NbbHLH2</i> | GQ859153.1     | <i>Nicotiana benthamiana</i>       | Solanaceae   |
| <i>NtMYC1b</i> | GQ859159.1     | <i>Nicotiana tabacum</i>           | Solanaceae   |
| <i>NtMYC2a</i> | GQ859160.1     | <i>Nicotiana tabacum</i>           | Solanaceae   |
| <i>NtMYC2c</i> | GQ859158.1     | <i>Nicotiana tabacum</i>           | Solanaceae   |
| <i>PsbHLH</i>  | KJ466971.1     | <i>Paeonia suffruticosa</i>        | Paeoniaceae  |
| <i>PtbHLH</i>  | XM_002302601.2 | <i>Populus trichocarpa</i>         | Salicaceae   |
| <i>RabHLH</i>  | DQ078120.1     | <i>Rheum australe</i>              | Polygonaceae |
| <i>SIMYC2</i>  | KF428776.1     | <i>Solanum lycopersicum</i>        | Solanaceae   |
| <i>SmfMYC2</i> | KJ139992.1     | <i>Salvia miltiorrhiza f. alba</i> | Lamiaceae    |
| <i>StMYCa</i>  | AJ630505.1     | <i>Solanum tuberosum</i>           | Solanaceae   |
| <i>StMYCb</i>  | AJ630506.1     | <i>Solanum tuberosum</i>           | Solanaceae   |
| <i>TcbHLH</i>  | XM_007039431.1 | <i>Theobroma cacao</i>             | Malvaceae    |
| <i>TcMYC2i</i> | XM_007051465.1 | <i>Theobroma cacao</i>             | Malvaceae    |
| <i>VvMYC2</i>  | NM_001281045.1 | <i>Vitis vinifera</i>              | Vitaceae     |

---



**Supplementary Table S2.** Primers used for vector construction.

| Primer name         | Sequence(5'→3')                           | Note                                          |
|---------------------|-------------------------------------------|-----------------------------------------------|
| <i>SmMYC2asclF</i>  | AAAGATCTTATGATTGATTACCGCACGCC             | Subcellularlocalization<br>( <i>SmMYC2a</i> ) |
| <i>SmMYC2asclR</i>  | AAACTAGTTCTAATCTCAGCAACTTTAG              |                                               |
| <i>SmMYC2bsclF</i>  | AAAGATCTTATGGGGGTTGTTGGTTGG               | Subcellularlocalization<br>( <i>SmMYC2b</i> ) |
| <i>SmMYC2bsclR</i>  | AAACTAGTCCCAGAGATAACTGATG                 |                                               |
| <i>SmMYC2apeF</i>   | AAGGATCCATGATTGATTACCGCACGCC              | Prokaryoticexpression<br>( <i>SmMYC2a</i> )   |
| <i>SmMYC2apeR</i>   | AAGCTTCTATCTAATCTCAGCAACTTTAG             |                                               |
| <i>SmMYC2bpeF</i>   | AAGATATCATGGGGGTTGTTGGTTGG                | Prokaryoticexpression<br>( <i>SmMYC2b</i> )   |
| <i>SmMYC2bpeR</i>   | AAGTCGACTTACCCGAGAGATAACTGATG             |                                               |
| <i>SmMYC2apADF</i>  | AACATATGATGATTGATTACCGCACGCC              | Yeast-twohybrid<br>( <i>SmMYC2a</i> )         |
| <i>SmMYC2apADR</i>  | AAGAATTCCTATCTAATCTCAGCAACTTTAG           |                                               |
| <i>SmMYC2bpADF</i>  | GGGAATTCCATATGGAATTCCCGATGGGGGTTGTTGGTTGG | Yeast-twohybrid<br>( <i>SmMYC2b</i> )         |
| <i>SmMYC2bpADR</i>  | TCCCCCGGGGGGATTACCCGAGAGATAACTGATG        |                                               |
| <i>SmJAZ1pBDF</i>   | AAGAATTCATGGAGAGAGATTCATGGG               | Yeast-twohybrid<br>( <i>SmJAZ1</i> )          |
| <i>SmJAZ1pBDR</i>   | AAGGATCCTCAGTCATCCTTGCTGACGG              |                                               |
| <i>SmJAZ2pBDF</i>   | AACATATGATGTCTAGTTCAAGAATG                | Yeast-twohybrid<br>( <i>SmJAZ2</i> )          |
| <i>SmJAZ2pBDR</i>   | AAGAATTCTCATAATTTGAGCTCAAG                |                                               |
| <i>SmMYC2aRNAiF</i> | AATCTAGACCATGGGGGCTCCACGGAGCCCATCTTC      | RNAi( <i>SmMYC2a</i> )                        |
| <i>SmMYC2aRNAiR</i> | AAGGATCCGGTACCAGACCTCTTCTTACTCTCTCT       |                                               |
| <i>SmMYC2bRNAiF</i> | AATCTAGACCATGGCCTCAGGTCGAAACAAGC          | RNAi( <i>SmMYC2b</i> )                        |
| <i>SmMYC2bRNAiR</i> | AAGGATCCGGTACCCCTTGAGGTCGCTCCAGTAAAATC    |                                               |

**Supplementary Table S3.** Primers of *SmMYC2s* and pathway genes used for qRT-PCR analysis.

| Primer name        | Sequence (5'→3')        | Note                       |
|--------------------|-------------------------|----------------------------|
| <i>SmMYC2a</i> RTF | CTAGGAAACGGGGAAGGAAG    | qRT-PCR( <i>SmMYC2a</i> )  |
| <i>SmMYC2a</i> RTR | TGGACTTGAGCTCGTTGATG    |                            |
| <i>SmMYC2b</i> RTF | GTTGCCAACGGGAATAGAG     | qRT-PCR( <i>SmMYC2b</i> )  |
| <i>SmMYC2b</i> RTR | GCTTCCTCGGCCTCTTATC     |                            |
| <i>SmCMK</i> RTF   | CCTTGGTGGTGGCAGCAGTAA   | qRT-PCR( <i>SmCMK</i> )    |
| <i>SmCMK</i> RTR   | GGTGGAGGAATATCTTCGACG   |                            |
| <i>SmDXR</i> RTF   | TGGCCAGAGAGAATCTACTGC   | qRT-PCR( <i>SmDXR</i> )    |
| <i>SmDXR</i> RTR   | GGCTGCACTAAGAACTCCGGT   |                            |
| <i>SmHMGR</i> RTF  | ACGTGCGTGTTGCTACGAGAC   | qRT-PCR ( <i>SmHMGR</i> )  |
| <i>SmHMGR</i> RTR  | CGTCGCCAGTGCTGCAACTAA   |                            |
| <i>SmMCS</i> RTF   | CCGACGGTGATGTATTGCTG    | qRT-PCR ( <i>SmMCS</i> )   |
| <i>SmMCS</i> RTR   | GCATAGATTGCCCCGCATAG    |                            |
| <i>SmMK</i> RTF    | AGAGCATTGGTAGCTGGTGT    | qRT-PCR ( <i>SmMK</i> )    |
| <i>SmMK</i> RTR    | TCTCCATCAGCTCCCCTAGT    |                            |
| <i>SmPMK</i> RTF   | AGCACCTTGGAGAGCTCATT    | qRT-PCR ( <i>SmMK</i> )    |
| <i>SmPMK</i> RTR   | CTTCCGGCTTGCTCTTTTGT    |                            |
| <i>SmGPPS</i> RTF  | TTGTTACACCGCTGCGAAAA    | qRT-PCR ( <i>SmGPPS</i> )  |
| <i>SmGPPS</i> RTR  | ATGTTTGCCTTGCGATTGGT    |                            |
| <i>SmGGPPS</i> RTF | TGAAATCACGGAAGCGCATT    | qRT-PCR ( <i>SmGGPPS</i> ) |
| <i>SmGGPPS</i> RTR | TCGTGGATCATCGGTGGATT    |                            |
| <i>SmCPS</i> RTF   | ACTACCGTTCATCAAGGCCA    | qRT-PCR ( <i>SmCPS</i> )   |
| <i>SmCPS</i> RTR   | CCTCGAGTTGATTCTGCACG    |                            |
| <i>SmKSL</i> RTF   | AGAGGGCTCATGTGCAACAA    | qRT-PCR ( <i>SmKSL</i> )   |
| <i>SmKSL</i> RTR   | TTCTGCAGCCAATTGACACC    |                            |
| <i>SmPAL</i> RTF   | ACCTACCTCGTCGCCCTATGC   | qRT-PCR ( <i>SmPAL</i> )   |
| <i>SmPAL</i> RTR   | CCACGCGGATCAAGTCCTTCT   |                            |
| <i>SmC4H</i> RTF   | CCAGGAGTCCAAATAACAGAGCC | qRT-PCR ( <i>SmC4H</i> )   |
| <i>SmC4H</i> RTR   | GAGCCACCAAGCGTTCACCAA   |                            |
| <i>Sm4CL</i> RTF   | ATTCGCATTTCGATTTCTCGG   | qRT-PCR ( <i>Sm4CL</i> )   |
| <i>Sm4CL</i> RTR   | GCGGCGTAGTGCTTACCTTT    |                            |
| <i>SmTAT</i> RTF   | TTCAACGGCTACGCTCCAAC    | qRT-PCR ( <i>SmTAT</i> )   |
| <i>SmTAT</i> RTR   | AAACGGACAATGCTATCTCAAT  |                            |
| <i>SmHPPR</i> RTF  | GACTCCAGAAACAACCCACATT  | qRT-PCR ( <i>SmHPPR</i> )  |
| <i>SmHPPR</i> RTR  | CCCAGACGACCCTCCACAAGA   |                            |
| <i>SmHCT6</i> RTF  | CCCTCCATTTTCATCAGCACG   | qRT-PCR ( <i>SmRAS6</i> )  |

|                       |                      |                          |
|-----------------------|----------------------|--------------------------|
| <i>SmHCT6</i> RTR     | GATTTGTCGGTGTTGGGGAG |                          |
| <i>SmCYP98A14</i> RTF | CCATCATCGCCCTTCTTTGG | qRT-PCR ( <i>SmCYP</i> ) |
| <i>SmCYP98A14</i> RTR | TGTCCACTTCCGTCATCACA |                          |
| <i>Smactin F</i>      | ATGATAACTCGACGGATCGC | qRT-PCR                  |
| <i>Smactin R</i>      | CTTGATGTGGTAGCCGTTT  | (Housekeeping gene)      |

---

**Supplementary Table S4.** Primers used in the identification of transgenic hairy roots.

| Primer name | Sequence (5'→3')        | Note                          |
|-------------|-------------------------|-------------------------------|
| JDPDKF      | ACAGTGGTCCCAAAGATGGA    | Identification of vector      |
| JDPDKR      | GGCGGTAAGGATCTGAGCTA    | pCambia1300-pHANNBIAL         |
| HptF        | CGATTTGTGTACGCCCGACAGTC | Identification of hairy roots |
| HptR        | CGATGTAGGAGGGCGTGGATATG |                               |
| rolBF       | GCTCTTGCAGTGCTAGATTT    | Identification of hairy roots |
| rolBR       | GAAGGTGCAAGCTACCTCTC    |                               |
| rolCF       | CTCCTGACATCAAACCTCGTC   | Identification of hairy roots |
| rolCR       | TGCTTCGAGTTATGGGTACA    |                               |

---
